# Supplementary material for: Tricuspid Valve Geometrical Changes in Patients with Functional Tricuspid Regurgitation: Insights from a CT Scan Analysis Focusing on Commissures
Source: MDPI journal article supplement (doi:10.3390/jcm12051712), 2023-02-21
Supplement: s1 [file s1]

# Supplementary Materials:

**Table S1.** Tricuspid valve measurements and differences between patients with pure functional TR and CIED-induced TR.

|                                     | Functional TR<br>(n=25) | CIED-TR<br>(n=18) | Difference (95% CI)    | p     |
|-------------------------------------|-------------------------|-------------------|------------------------|-------|
| Annulus area (cm <sup>2</sup> ± SD) | 16.35 ± 3.12            | 17.51 ± 4.09      | -1.15 (-3.37 to 1.07)  | 0.301 |
| Annulus perimeter (mm ± SD)         | 144.87 ± 14.66          | 151.79 ± 19.85    | -6.92 (-17.53 to 3.70) | 0.196 |
| SL diameter (mm ± SD)               | 46.02 ± 6.40            | 47.88 ± 6.50      | -1.86 (-5.89 to 2.16)  | 0.355 |
| AP diameter (mm ± SD)               | 45.42 ± 4.58            | 46.03 ± 5.76      | -0.61 (-3.79 to 2.58)  | 0.702 |
| Eccentricity (index ± SD)           | 1.00 ± 0.14             | 0.97 ± 0.09       | 0.03 (-0.04 to 0.11)   | 0.380 |
| AS-PS (mm ± SD)                     | 37.88 ± 5.36            | 39.70 ± 6.07      | -1.83 (-5.37 to 1.70)  | 0.302 |
| PS-AP (mm ± SD)                     | 39.61 ± 5.51            | 42.25 ± 5.86      | -2.64 (-6.17 to 0.89)  | 0.139 |
| AP-AS (mm ± SD)                     | 38.34 ± 4.58            | 39.44 ± 5.79      | -1.10 (-4.30 to 2.24)  | 0.489 |
| Ce-AS (mm ± SD)                     | 21.64 ± 2.55            | 22.46 ± 3.35      | -0.82 (-2.64 to 1.10)  | 0.368 |
| Ce-PS (mm ± SD)                     | 22.43 ± 3.68            | 23.84 ± 3.87      | -1.41 (-3.75 to 0.97)  | 0.232 |
| Ce-AP (mm ± SD)                     | 22.41 ± 2.45            | 23.69 ± 3.23      | -1.28 (-3.03 to 0.47)  | 0.147 |
| α (° ± SD)                          | 118.56 ± 8.69           | 117.00 ± 10.57    | 1.56 (-4.38 to 7.50)   | 0.599 |
| β (° ± SD)                          | 121.91 ± 8.59           | 125.67 ± 7.85     | -3.75 (-8.92 to 1.43)  | 0.152 |
| γ (° ± SD)                          | 118.72 ± 9.03           | 117.33 ± 8.38     | 1.39 (-4.08 to 6.86)   | 0.611 |

AP: antero-posterior; AS: antero-septal; Ce: centroid; CI: confidence interval; CIED: cardiac implantable electronic device; PS: postero-septal; SD: standard deviation; SL: septo-lateral; TR: tricuspid regurgitation

**Table S2.** Pearson correlation between CT variables and TR grade assessed with echocardiography

|                            | Coefficient r | p      |
|----------------------------|---------------|--------|
| Annulus area               | 0.580         | <0.001 |
| Annulus perimeter          | 0.468         | <0.001 |
| Septal-lateral dimension   | 0.646         | <0.001 |
| Antero-posterior dimension | 0.462         | <0.001 |
| Eccentricity               | -0.277        | 0.005  |
| AS-PS                      | 0.256         | <0.001 |
| PS-AP                      | 0.389         | <0.001 |
| AP-AS                      | 0.557         | <0.001 |
| Ce-AS                      | 0.470         | <0.001 |
| Ce-PS                      | 0.286         | 0.04   |
| Ce-AP                      | 0.526         | <0.001 |
| α                          | -0.166        | 0.063  |
| β                          | -0.46         | 0.338  |
| γ                          | 0.207         | 0.028  |

AP: antero-posterior; AS: antero-septal; Ce: centroid; CI: confidence interval; PS: postero-septal; SD: standard deviation; SL: septo-lateral

**Table S3.** Kruskal-Wallis analysis testing the CT values distribution across the expanded TR grades by echocardiography

|                            | H      | p      |
|----------------------------|--------|--------|
| Annulus area               | 33,007 | <0.001 |
| Annulus perimeter          | 21,921 | <0.001 |
| Septal-lateral dimension   | 40,204 | <0.001 |
| Antero-posterior dimension | 25,322 | <0.001 |
| Eccentricity               | 9,940  | 0.019  |
| AS-PS                      | 12,107 | 0.007  |
| PS-AP                      | 17,038 | 0.001  |
| AP-AS                      | 31,967 | <0.001 |
| Ce-AS                      | 23,402 | <0.001 |
| Ce-PS                      | 11,034 | 0.012  |
| Ce-AP                      | 25,254 | <0.001 |
| $\alpha$                   | 3,901  | 0.272  |
| $\beta$                    | 1,603  | 0.659  |
| $\gamma$                   | 6,900  | 0.075  |

AP: antero-posterior; AS: antero-septal; Ce: centroid; CI: confidence interval; PS: postero-septal; SD: standard deviation; SL: septo-lateral
